# Supplementary material
Source: Research Square preprint supplement (doi:10.21203/rs.3.rs-9355284/v1)
Supplement: Supplementary file 1 [file 145e733bec1414b65bf94fc5.docx]

Table 3. Bootstrap Analysis of Mediation Effects (1,000 Replications)

| **Effect_Type** | **Estimate** | **Boot SE** | **95% BCa CI** | **P_Value** |
| --- | --- | --- | --- | --- |
| Direct Effect (Path a): EI -> Occupational Anxiety | 0.103 | 0.087 | [-0.028, 0.314] | 0.100 |
| Direct Effect (Path b): Occupational Anxiety -> NARS SE | 0.064 | 0.055 | [-0.038, 0.182] | 0.235 |
| Direct Effect (Path c'): EI -> NARS Self-Efficacy | 0.599 | 0.082 | [0.681, 1.000] | <0.001 *** |
| **Indirect Effect: EI -> Anxiety -> NARS SE** | 0.007 | 0.011 | [-0.003, 0.046] | 0.396 |
| Total Effect: EI -> NARS SE | 0.606 | 0.080 | [0.694, 1.003] | <0.001 *** |
| **Proportion of Mediation (%)** | 1.1 % | - | - | - |
| Note: Bias-corrected and accelerated (BCa) 95% confidence intervals. *** p < 0.001. The Proportion of Mediation reflects the extent to which occupational anxiety channels the effect of EI onto NARS competencies. | | | | |
