# Supplementary material
Source: Research Square preprint supplement (doi:10.21203/rs.3.rs-9355284/v1)
Supplement: Supplementary file 2 [file 1d09046efcf8c714c98ec087.docx]

Table S4. One-way ANOVA Results for Total EI and Empathy Across Multidisciplinary Majors

| **Variables / Dimensions** | **Grouping Factor** | **df (Degrees of Freedom)** | **F-statistic** | **p-value** |
| --- | --- | --- | --- | --- |
| Total Emotional Intelligence (EI_Total) | Major | 6 | 3.68 | 0.001 |
| Empathy (OEA_Total / Others' Emotion Appraisal) | Major | 6 | 2.91 | 0.008 |
| F-statistics and p-values were derived from one-way Analysis of Variance (ANOVA) comparing scores across different academic majors. | | | | |
