# Supplementary material
Source: Research Square preprint supplement (doi:10.21203/rs.3.rs-9355284/v1)
Supplement: Supplementary file 3 [file 25aedfccfc074caf70ceca50.docx]

Table S5. Differences in NARS Competency Self-Efficacy by First Choice and Clinical Experience

|  | **First Choice of Major** | | | **Early Clinical Experience** | | |
| --- | --- | --- | --- | --- | --- | --- |
| **Characteristic1** | **Yes  N = 3341** | **No  N = 2101** | **p-value1** | **None  N = 2431** | **Experienced  N = 3011** | **p-value1** |
| Medical Provider SE | 3.46 ± 0.91 | 3.29 ± 0.89 | 0.033 | 3.32 ± 0.93 | 3.45 ± 0.89 | 0.096 |
| Health Promoter SE | 3.64 ± 0.82 | 3.45 ± 0.87 | 0.011 | 3.47 ± 0.87 | 3.64 ± 0.82 | 0.026 |
| Team Member SE | 3.61 ± 0.82 | 3.43 ± 0.83 | 0.012 | 3.46 ± 0.85 | 3.60 ± 0.81 | 0.046 |
| 1Data are presented as Mean ± Standard Deviation (SD). P-values were calculated using independent samples t-tests. | | | | | | |
