# Supplementary material
Source: Research Square preprint supplement (doi:10.21203/rs.3.rs-9355284/v1)
Supplement: Supplementary file 4 [file 3357f573d9284076d202c961.docx]

Table S7. Structural Equation Modeling (SEM): Direct, Indirect, and Total Effects

| **Path_Description** | **Standardized Beta** | **Z-value** | **P_Value** |
| --- | --- | --- | --- |
| EI -> Occupational Anxiety (Path a) | 0.100 | 2.10 | 0.036 * |
| EI -> NARS Self-Efficacy (Direct: Path c') | 0.594 | 12.77 | <0.001 *** |
| Occupational Anxiety -> NARS Self-Efficacy (Path b) | 0.068 | 1.77 | 0.077 |
| **EI -> Anxiety -> NARS SE (Indirect Effect)** | 0.007 | 1.43 | 0.154 |
| **EI -> NARS Self-Efficacy (Total Effect)** | 0.600 | 12.90 | <0.001 *** |
| Note: Standardized Beta coefficients are reported. Z-value represents the critical ratio. *** p < 0.001, ** p < 0.01, * p < 0.05. The model controls for measurement error by utilizing latent variables. | | | |
