# Supplementary material
Source: Research Square preprint supplement (doi:10.21203/rs.3.rs-9355284/v1)
Supplement: Supplementary file 5 [file 40b1375031dc98bcf06e21de.docx]

Table S2. Psychometric Properties: Reliability and Second-Order CFA Fit Indices of the Self-Developed Scales

| **Construct** | **Items** | **Cronbach_Alpha** | **Chi_Square_df** | **CFI** | **TLI** | **RMSEA** | **SRMR** |
| --- | --- | --- | --- | --- | --- | --- | --- |
| **Clinical Pharmacology NARS Self-Efficacy Scale** | 12 | 0.980 | 3.37 | 0.988 | 0.984 | 0.066 | 0.015 |
| - Medical Provider (MP) | 4 | 0.974 | - | - | - | - | - |
| - Health Promoter (HP) | 4 | 0.962 | - | - | - | - | - |
| - Team Member (TM) | 4 | 0.964 | - | - | - | - | - |
| **Occupational Anxiety Scale** | 9 | 0.968 | 4.50 | 0.986 | 0.979 | 0.080 | 0.017 |
| - Error & Safety Anxiety (ES) | 3 | 0.936 | - | - | - | - | - |
| - Doctor-Patient Conflict Anxiety (DP) | 3 | 0.950 | - | - | - | - | - |
| - High-Pressure Environment Anxiety (HP) | 3 | 0.944 | - | - | - | - | - |
| Note: CFI = Comparative Fit Index (> 0.90 acceptable); TLI = Tucker-Lewis Index (> 0.90 acceptable); RMSEA = Root Mean Square Error of Approximation (< 0.08 acceptable); SRMR = Standardized Root Mean Square Residual (< 0.08 acceptable). A higher Cronbach's alpha indicates higher internal consistency reliability (> 0.70 acceptable, > 0.80 excellent). | | | | | | | |
