# Supplementary material
Source: Research Square preprint supplement (doi:10.21203/rs.3.rs-9355284/v1)
Supplement: Supplementary file 6 [file 8afbed72572f91aa9a4ae4be.docx]

Table S3. Goodness-of-Fit Indices for Measurement and Structural Models

| **Model Type** | **Chi-Square** | **df** | **P-value** | **CFI** | **TLI** | **RMSEA** | **SRMR** |
| --- | --- | --- | --- | --- | --- | --- | --- |
| **Measurement Model (Overall CFA)** | 87.31 | 32 | <0.001 | 0.987 | 0.981 | 0.056 | 0.032 |
| **Structural Model (Final SEM)** | 87.31 | 32 | <0.001 | 0.987 | 0.981 | 0.056 | 0.032 |
| Note: Acceptable fit thresholds: CFI > 0.90, TLI > 0.90, RMSEA < 0.08, SRMR < 0.08. Both the measurement and structural models demonstrate excellent fit to the data, satisfying all psychometric requirements. | | | | | | | |
