# Supplementary material
Source: Research Square preprint supplement (doi:10.21203/rs.3.rs-9355284/v1)
Supplement: Supplementary file 8 [file bf780fa96e337c50dfa24383.docx]

Table S1. Descriptive Statistics and Normality Tests of Core Latent Variables

| **Variables / Dimensions** | **N** | **Mean** | **SD** | **Skewness** | **Kurtosis** |
| --- | --- | --- | --- | --- | --- |
| Self-Awareness (SEA) | 544 | 4.06 | 0.74 | -0.709 | 1.164 |
| Empathy (OEA) | 544 | 3.75 | 0.77 | -0.394 | 0.644 |
| Emotion Use (UOE) | 544 | 3.68 | 0.80 | -0.222 | 0.167 |
| Emotion Regulation (ROE) | 544 | 3.65 | 0.81 | -0.207 | 0.099 |
| **Total Emotional Intelligence** | 544 | 3.78 | 0.65 | -0.317 | 1.113 |
| Medical Provider SE | 544 | 3.39 | 0.91 | -0.237 | 0.155 |
| Health Promoter SE | 544 | 3.56 | 0.85 | -0.344 | 0.522 |
| Team Member SE | 544 | 3.54 | 0.83 | -0.212 | 0.522 |
| **Total Self-Efficacy** | 544 | 3.50 | 0.82 | -0.198 | 0.541 |
| Error Anxiety (ES) | 544 | 3.27 | 0.91 | -0.205 | 0.031 |
| Conflict Anxiety (DP) | 544 | 3.28 | 0.91 | -0.180 | 0.061 |
| High-Pressure Anxiety (HP) | 544 | 3.27 | 0.91 | -0.189 | 0.034 |
| **Total Occupational Anxiety** | 544 | 3.28 | 0.86 | -0.229 | 0.276 |
| SD = Standard Deviation. Skewness values between -3.0 and +3.0, and kurtosis values between -10.0 and +10.0 indicate acceptable univariate normality, meeting the fundamental assumptions for Maximum Likelihood (ML) estimation in Structural Equation Modeling (SEM). | | | | | |
