# Supplementary material
Source: Research Square preprint supplement (doi:10.21203/rs.3.rs-9355284/v1)
Supplement: Supplementary file 9 [file c77ccdb69e960c129e565a73.docx]

**Supplementary files**

Table S1. One-way ANOVA Results for Total EI and Empathy Across Multidisciplinary Majors

| **Variables / Dimensions** | **N** | **Mean** | **SD** | **Skewness** | **Kurtosis** |
| --- | --- | --- | --- | --- | --- |
| Self-Awareness (SEA) | 544 | 4.06 | 0.74 | -0.709 | 1.164 |
| Empathy (OEA) | 544 | 3.75 | 0.77 | -0.394 | 0.644 |
| Emotion Use (UOE) | 544 | 3.68 | 0.80 | -0.222 | 0.167 |
| Emotion Regulation (ROE) | 544 | 3.65 | 0.81 | -0.207 | 0.099 |
| **Total Emotional Intelligence** | 544 | 3.78 | 0.65 | -0.317 | 1.113 |
| Medical Provider SE | 544 | 3.39 | 0.91 | -0.237 | 0.155 |
| Health Promoter SE | 544 | 3.56 | 0.85 | -0.344 | 0.522 |
| Team Member SE | 544 | 3.54 | 0.83 | -0.212 | 0.522 |
| **Total Self-Efficacy** | 544 | 3.50 | 0.82 | -0.198 | 0.541 |
| Error Anxiety (ES) | 544 | 3.27 | 0.91 | -0.205 | 0.031 |
| Conflict Anxiety (DP) | 544 | 3.28 | 0.91 | -0.180 | 0.061 |
| High-Pressure Anxiety (HP) | 544 | 3.27 | 0.91 | -0.189 | 0.034 |
| **Total Occupational Anxiety** | 544 | 3.28 | 0.86 | -0.229 | 0.276 |
| SD = Standard Deviation. Skewness values between -3.0 and +3.0, and kurtosis values between -10.0 and +10.0 indicate acceptable univariate normality, meeting the fundamental assumptions for Maximum Likelihood (ML) estimation in Structural Equation Modeling (SEM). | | | | | |

Table S2. Psychometric Properties: Reliability and Second-Order CFA Fit Indices of the Self-Developed Scales

| **Construct** | **Items** | **Cronbach_Alpha** | **Chi_Square_df** | **CFI** | **TLI** | **RMSEA** | **SRMR** |
| --- | --- | --- | --- | --- | --- | --- | --- |
| **Clinical Pharmacology NARS Self-Efficacy Scale** | 12 | 0.980 | 3.37 | 0.988 | 0.984 | 0.066 | 0.015 |
| - Medical Provider (MP) | 4 | 0.974 | - | - | - | - | - |
| - Health Promoter (HP) | 4 | 0.962 | - | - | - | - | - |
| - Team Member (TM) | 4 | 0.964 | - | - | - | - | - |
| **Occupational Anxiety Scale** | 9 | 0.968 | 4.50 | 0.986 | 0.979 | 0.080 | 0.017 |
| - Error & Safety Anxiety (ES) | 3 | 0.936 | - | - | - | - | - |
| - Doctor-Patient Conflict Anxiety (DP) | 3 | 0.950 | - | - | - | - | - |
| - High-Pressure Environment Anxiety (HP) | 3 | 0.944 | - | - | - | - | - |
| Note: CFI = Comparative Fit Index (> 0.90 acceptable); TLI = Tucker-Lewis Index (> 0.90 acceptable); RMSEA = Root Mean Square Error of Approximation (< 0.08 acceptable); SRMR = Standardized Root Mean Square Residual (< 0.08 acceptable). A higher Cronbach's alpha indicates higher internal consistency reliability (> 0.70 acceptable, > 0.80 excellent). | | | | | | | |

*(Note: Confirms that univariate skewness and kurtosis meet the fundamental assumptions for Maximum Likelihood estimation)*

Table S3. Goodness-of-Fit Indices for Measurement and Structural Models

| **Model Type** | **Chi-Square** | **df** | **P-value** | **CFI** | **TLI** | **RMSEA** | **SRMR** |
| --- | --- | --- | --- | --- | --- | --- | --- |
| **Measurement Model (Overall CFA)** | 87.31 | 32 | <0.001 | 0.987 | 0.981 | 0.056 | 0.032 |
| **Structural Model (Final SEM)** | 87.31 | 32 | <0.001 | 0.987 | 0.981 | 0.056 | 0.032 |
| Note: Acceptable fit thresholds: CFI > 0.90, TLI > 0.90, RMSEA < 0.08, SRMR < 0.08. Both the measurement and structural models demonstrate excellent fit to the data, satisfying all psychometric requirements. | | | | | | | |

*(Note: Confirms robust model fit with CFI > 0.90 and RMSEA < 0.08)*

Table S4. One-way ANOVA Results for Total EI and Empathy Across Multidisciplinary Majors

| **Variables / Dimensions** | **Grouping Factor** | **df (Degrees of Freedom)** | **F-statistic** | **p-value** |
| --- | --- | --- | --- | --- |
| Total Emotional Intelligence (EI_Total) | Major | 6 | 3.68 | 0.001 |
| Empathy (OEA_Total / Others' Emotion Appraisal) | Major | 6 | 2.91 | 0.008 |
| F-statistics and p-values were derived from one-way Analysis of Variance (ANOVA) comparing scores across different academic majors. | | | | |

*(Note: Supplements the Bootstrap results with underlying Z-values and corresponding p-values)*

Table S5. Differences in NARS Competency Self-Efficacy by First Choice and Clinical Experience

|  | **First Choice of Major** | | | **Early Clinical Experience** | | |
| --- | --- | --- | --- | --- | --- | --- |
| **Characteristic1** | **Yes  N = 3341** | **No  N = 2101** | **p-value1** | **None  N = 2431** | **Experienced  N = 3011** | **p-value1** |
| Medical Provider SE | 3.46 ± 0.91 | 3.29 ± 0.89 | 0.033 | 3.32 ± 0.93 | 3.45 ± 0.89 | 0.096 |
| Health Promoter SE | 3.64 ± 0.82 | 3.45 ± 0.87 | 0.011 | 3.47 ± 0.87 | 3.64 ± 0.82 | 0.026 |
| Team Member SE | 3.61 ± 0.82 | 3.43 ± 0.83 | 0.012 | 3.46 ± 0.85 | 3.60 ± 0.81 | 0.046 |
| 1Data are presented as Mean ± Standard Deviation (SD). P-values were calculated using independent samples t-tests. | | | | | | |

*(Note: Numerical data supplementing the visual findings presented in Figure 2.)*

Table S6. Pearson Correlation Matrix of Core Latent Variables and Sub-dimensions

| **Variables** | **1** | **2** | **3** | **4** | **5** | **6** | **7** | **8** | **9** | **10** | **11** | **12** | **13** |
| --- | --- | --- | --- | --- | --- | --- | --- | --- | --- | --- | --- | --- | --- |
| **1. Total Emotional Intelligence** | - |  |  |  |  |  |  |  |  |  |  |  |  |
| 2. Self-Awareness (SEA) | 0.84*** | - |  |  |  |  |  |  |  |  |  |  |  |
| 3. Empathy (OEA) | 0.79*** | 0.59*** | - |  |  |  |  |  |  |  |  |  |  |
| 4. Emotion Use (UOE) | 0.86*** | 0.62*** | 0.56*** | - |  |  |  |  |  |  |  |  |  |
| 5. Emotion Regulation (ROE) | 0.84*** | 0.63*** | 0.50*** | 0.67*** | - |  |  |  |  |  |  |  |  |
| **6. Total Self-Efficacy** | 0.54*** | 0.42*** | 0.44*** | 0.48*** | 0.46*** | - |  |  |  |  |  |  |  |
| 7. Medical Provider SE | 0.48*** | 0.37*** | 0.39*** | 0.44*** | 0.41*** | 0.95*** | - |  |  |  |  |  |  |
| 8. Health Promoter SE | 0.51*** | 0.41*** | 0.43*** | 0.44*** | 0.42*** | 0.95*** | 0.85*** | - |  |  |  |  |  |
| 9. Team Member SE | 0.55*** | 0.43*** | 0.44*** | 0.48*** | 0.49*** | 0.95*** | 0.84*** | 0.87*** | - |  |  |  |  |
| **10. Total Occupational Anxiety** | 0.10* | 0.04 | 0.14*** | 0.12** | 0.03 | 0.12** | 0.10* | 0.12** | 0.11** | - |  |  |  |
| 11. Error & Safety Anxiety | 0.10* | 0.06 | 0.12** | 0.12** | 0.04 | 0.12** | 0.11* | 0.10* | 0.12** | 0.93*** | - |  |  |
| 12. Conflict Anxiety | 0.09* | 0.02 | 0.14** | 0.11** | 0.02 | 0.13** | 0.12** | 0.13** | 0.12** | 0.95*** | 0.83*** | - |  |
| 13. High-Pressure Anxiety | 0.09* | 0.02 | 0.15*** | 0.11** | 0.02 | 0.08 | 0.06 | 0.10* | 0.08 | 0.94*** | 0.81*** | 0.86*** | - |
| * p < 0.05, ** p < 0.01, *** p < 0.001. Variables 1-13 correspond to the numbered variables in the first column. Dash (-) indicates the diagonal. | | | | | | | | | | | | | |

*(Note: Numerical matrix supplementing the multidimensional relationships visualized in Figure 3.)*

Table S7. Structural Equation Modeling (SEM): Direct, Indirect, and Total Effects

| **Path_Description** | **Standardized Beta** | **Z-value** | **P_Value** |
| --- | --- | --- | --- |
| EI -> Occupational Anxiety (Path a) | 0.100 | 2.10 | 0.036 * |
| EI -> NARS Self-Efficacy (Direct: Path c') | 0.594 | 12.77 | <0.001 *** |
| Occupational Anxiety -> NARS Self-Efficacy (Path b) | 0.068 | 1.77 | 0.077 |
| **EI -> Anxiety -> NARS SE (Indirect Effect)** | 0.007 | 1.43 | 0.154 |
| **EI -> NARS Self-Efficacy (Total Effect)** | 0.600 | 12.90 | <0.001 *** |
| Note: Standardized Beta coefficients are reported. Z-value represents the critical ratio. *** p < 0.001, ** p < 0.01, * p < 0.05. The model controls for measurement error by utilizing latent variables. | | | |

*(Note: Reports Cronbach's alpha coefficients confirming excellent internal consistency of the self-developed NARS scale. )*
