# Supplementary material
Source: Research Square preprint supplement (doi:10.21203/rs.3.rs-9355284/v1)
Supplement: Supplementary file 10 [file c85889bf5089f9f49bd42d08.docx]

Table 1. Baseline Demographic and Educational Characteristics of Medical Students by Major

| **Baseline Characteristics1** | **Overall  N = 5441** | **Clinical Medicine  N = 2251** | **Nursing  N = 41** | **Pharmacy  N = 2131** | **Anesthesiology  N = 81** | **Pediatrics  N = 301** | **Pharmaceutics  N = 541** | **Other  N = 101** | **p-value1** |
| --- | --- | --- | --- | --- | --- | --- | --- | --- | --- |
| **Gender** |  |  |  |  |  |  |  |  | <0.001 |
| Male | 202 (37%) | 104 (46%) | 1 (25%) | 63 (30%) | 7 (88%) | 9 (30%) | 13 (24%) | 5 (50%) |  |
| Female | 342 (63%) | 121 (54%) | 3 (75%) | 150 (70%) | 1 (13%) | 21 (70%) | 41 (76%) | 5 (50%) |  |
| **Academic Year** |  |  |  |  |  |  |  |  | <0.001 |
| Sophomore (Year 2) | 63 (12%) | 3 (1.3%) | 1 (25%) | 23 (11%) | 1 (13%) | 0 (0%) | 33 (61%) | 2 (20%) |  |
| Junior (Year 3) | 383 (70%) | 149 (66%) | 2 (50%) | 177 (83%) | 3 (38%) | 29 (97%) | 21 (39%) | 2 (20%) |  |
| Senior (Year 4) | 73 (13%) | 59 (26%) | 0 (0%) | 10 (4.7%) | 3 (38%) | 0 (0%) | 0 (0%) | 1 (10%) |  |
| Year 5 | 2 (0.4%) | 2 (0.9%) | 0 (0%) | 0 (0%) | 0 (0%) | 0 (0%) | 0 (0%) | 0 (0%) |  |
| Other | 23 (4.2%) | 12 (5.3%) | 1 (25%) | 3 (1.4%) | 1 (13%) | 1 (3.3%) | 0 (0%) | 5 (50%) |  |
| **First Choice of Major** | 334 (61%) | 184 (82%) | 2 (50%) | 99 (46%) | 5 (63%) | 9 (30%) | 30 (56%) | 5 (50%) | <0.001 |
| **Academic Performance Rank** |  |  |  |  |  |  |  |  | 0.892 |
| Top 20% | 144 (26%) | 64 (28%) | 0 (0%) | 54 (25%) | 1 (13%) | 11 (37%) | 12 (22%) | 2 (20%) |  |
| 21-50% | 210 (39%) | 86 (38%) | 2 (50%) | 84 (39%) | 3 (38%) | 10 (33%) | 19 (35%) | 6 (60%) |  |
| 51-80% | 158 (29%) | 62 (28%) | 1 (25%) | 62 (29%) | 3 (38%) | 8 (27%) | 20 (37%) | 2 (20%) |  |
| Bottom 20% | 32 (5.9%) | 13 (5.8%) | 1 (25%) | 13 (6.1%) | 1 (13%) | 1 (3.3%) | 3 (5.6%) | 0 (0%) |  |
| **Early Clinical Experience** |  |  |  |  |  |  |  |  | <0.001 |
| None | 243 (45%) | 37 (16%) | 1 (25%) | 140 (66%) | 4 (50%) | 4 (13%) | 51 (94%) | 6 (60%) |  |
| < 1 Month | 180 (33%) | 110 (49%) | 2 (50%) | 43 (20%) | 1 (13%) | 20 (67%) | 2 (3.7%) | 2 (20%) |  |
| 1-3 Months | 82 (15%) | 49 (22%) | 0 (0%) | 24 (11%) | 1 (13%) | 5 (17%) | 1 (1.9%) | 2 (20%) |  |
| > 3 Months | 39 (7.2%) | 29 (13%) | 1 (25%) | 6 (2.8%) | 2 (25%) | 1 (3.3%) | 0 (0%) | 0 (0%) |  |
| 1Data are presented as n (%). P-values were calculated using Fisher's exact test with Monte Carlo simulation (10,000 replicates) due to complex contingency tables. | | | | | | | | | |
