# Supplementary material
Source: Research Square preprint supplement (doi:10.21203/rs.3.rs-9355284/v1)
Supplement: Supplementary file 11 [file cbe5cf8e8bfbae4f1ff7f83d.docx]

Table S6. Pearson Correlation Matrix of Core Latent Variables and Sub-dimensions

| **Variables** | **1** | **2** | **3** | **4** | **5** | **6** | **7** | **8** | **9** | **10** | **11** | **12** | **13** |
| --- | --- | --- | --- | --- | --- | --- | --- | --- | --- | --- | --- | --- | --- |
| **1. Total Emotional Intelligence** | - |  |  |  |  |  |  |  |  |  |  |  |  |
| 2. Self-Awareness (SEA) | 0.84*** | - |  |  |  |  |  |  |  |  |  |  |  |
| 3. Empathy (OEA) | 0.79*** | 0.59*** | - |  |  |  |  |  |  |  |  |  |  |
| 4. Emotion Use (UOE) | 0.86*** | 0.62*** | 0.56*** | - |  |  |  |  |  |  |  |  |  |
| 5. Emotion Regulation (ROE) | 0.84*** | 0.63*** | 0.50*** | 0.67*** | - |  |  |  |  |  |  |  |  |
| **6. Total Self-Efficacy** | 0.54*** | 0.42*** | 0.44*** | 0.48*** | 0.46*** | - |  |  |  |  |  |  |  |
| 7. Medical Provider SE | 0.48*** | 0.37*** | 0.39*** | 0.44*** | 0.41*** | 0.95*** | - |  |  |  |  |  |  |
| 8. Health Promoter SE | 0.51*** | 0.41*** | 0.43*** | 0.44*** | 0.42*** | 0.95*** | 0.85*** | - |  |  |  |  |  |
| 9. Team Member SE | 0.55*** | 0.43*** | 0.44*** | 0.48*** | 0.49*** | 0.95*** | 0.84*** | 0.87*** | - |  |  |  |  |
| **10. Total Occupational Anxiety** | 0.10* | 0.04 | 0.14*** | 0.12** | 0.03 | 0.12** | 0.10* | 0.12** | 0.11** | - |  |  |  |
| 11. Error & Safety Anxiety | 0.10* | 0.06 | 0.12** | 0.12** | 0.04 | 0.12** | 0.11* | 0.10* | 0.12** | 0.93*** | - |  |  |
| 12. Conflict Anxiety | 0.09* | 0.02 | 0.14** | 0.11** | 0.02 | 0.13** | 0.12** | 0.13** | 0.12** | 0.95*** | 0.83*** | - |  |
| 13. High-Pressure Anxiety | 0.09* | 0.02 | 0.15*** | 0.11** | 0.02 | 0.08 | 0.06 | 0.10* | 0.08 | 0.94*** | 0.81*** | 0.86*** | - |
| * p < 0.05, ** p < 0.01, *** p < 0.001. Variables 1-13 correspond to the numbered variables in the first column. Dash (-) indicates the diagonal. | | | | | | | | | | | | | |
