# Supplementary material
Source: Research Square preprint supplement (doi:10.21203/rs.3.rs-9355284/v1)
Supplement: Supplementary file 12 [file de7146496ca13853d23837da.docx]

Table 2. Streamlined Summary of the Structural Equation Model (SEM) Parameters

| **Category** | **Relationship** | **Estimate** | **Std.Err** | **Z-value** | **P-value** | **Standardized (β)** |
| --- | --- | --- | --- | --- | --- | --- |
| **1. Measurement Model (Standardized Factor Loadings)** | EI -> SEA_Total | 1.000 | 0.000 | NA |  | 0.782 |
| EI -> OEA_Total | 0.916 | 0.057 | 16.08 | <0.001 *** | 0.695 |
| EI -> UOE_Total | 1.119 | 0.059 | 19.08 | <0.001 *** | 0.816 |
| EI -> ROE_Total | 1.100 | 0.059 | 18.59 | <0.001 *** | 0.794 |
| Anx -> Anx_ES_Total | 1.000 | 0.000 | NA |  | 0.881 |
| Anx -> Anx_DP_Total | 1.059 | 0.032 | 33.05 | <0.001 *** | 0.942 |
| Anx -> Anx_HP_Total | 1.036 | 0.033 | 31.50 | <0.001 *** | 0.914 |
| SE -> SE_MP_Total | 1.000 | 0.000 | NA |  | 0.903 |
| SE -> SE_HP_Total | 0.963 | 0.027 | 35.75 | <0.001 *** | 0.935 |
| SE -> SE_TM_Total | 0.939 | 0.027 | 35.33 | <0.001 *** | 0.930 |
| **2. Structural Model (Direct Path Coefficients)** | EI -> Anx | 0.138 | 0.066 | 2.10 | 0.036 * | 0.100 |
| EI -> SE | 0.836 | 0.065 | 12.77 | <0.001 *** | 0.594 |
| Anx -> SE | 0.069 | 0.039 | 1.77 | 0.077 | 0.068 |
| **3. Mediation Analysis (Indirect & Total Effects)** | EI -> Anxiety -> NARS SE (Indirect Effect) | 0.010 | 0.007 | 1.43 | 0.154 | 0.007 |
| EI -> NARS SE (Total Effect) | 0.845 | 0.066 | 12.90 | <0.001 *** | 0.600 |
| Note: ML estimation was used. Standardized (β) represents fully standardized coefficients. *** p < 0.001, ** p < 0.01, * p < 0.05. The structural model accounted for 36.5% of the variance (R²) in NARS Competence Self-Efficacy. | | | | | | |
